# Supplementary material
Source: PubMed Central journal article supplement (PMC2626178)
Supplement: NIHMS86628-supplement-1_si_001.pdf [file NIHMS86628-supplement-1_si_001.pdf]

Supplementary Materials for the Manuscript Entitled

**“Improving Tumor Uptake and Excretion Kinetics of <sup>99m</sup>Tc-Labeled Cyclic Arginine-Glycine-Aspartic (RGD) Dimers with Triglycine Linkers”**

by

Jiyun Shi<sup>1</sup>, Lijun Wang<sup>1</sup>, Young-Seung Kim<sup>1</sup>, Shizhen Zhai<sup>1</sup>, Zhaofei Liu<sup>2</sup>, Xiaoyuan Chen<sup>2</sup>, and Shuang Liu<sup>1\*</sup>

<sup>1</sup>School of Health Sciences, Purdue University, IN 47907, USA

<sup>2</sup>Molecular Imaging Program at Stanford, Department of Radiology & Bio-X, Stanford University, Stanford, California, USA

Running Title: <sup>99m</sup>Tc-labeled cyclic RGD peptide dimers for tumor imaging

---

<sup>1\*</sup>To whom correspondence should be addressed. School of Health Sciences, Purdue University, 550 Stadium Mall Drive, West Lafayette, IN 47907. Phone: 765-494-0236; Fax 765-496-1377; Email: [lius@pharmacy.purdue.edu](mailto:lius@pharmacy.purdue.edu)

## Contents of Supporting Information

Table SI. Biodistribution data and T/B ratios of **7** in the athymic nude mice bearing MDA-MB-435 human breast cancer xenografts. The organ uptake is expressed as %ID/g. Each data point represents an average of biodistribution data from four animals.

Table SII. Biodistribution data and T/B ratios of **8** in the athymic nude mice bearing MDA-MB-435 human breast cancer xenografts. The organ uptake is expressed as %ID/g. Each data point represents an average of biodistribution data from four animals.

Table SIII. Biodistribution data and T/B ratios of **7** in the athymic nude mice bearing U87MG human glioma xenografts. The organ uptake is expressed as %ID/g. Each data point represents an average of biodistribution data from four animals.

Table SIV. Biodistribution data and T/B ratios of **10** in the athymic nude mice bearing U87MG human glioma xenografts. The organ uptake is expressed as %ID/g. Each data point represents an average of biodistribution data from four animals.

Figure SI. Radio-HPLC chromatograms of **7** in saline before injection, in urine at 30 min and 120 min p.i., and in feces at 120 min p.i. Each mouse was administered with ~ 100  $\mu$ Ci of **7**.

Figure SII. Radio-HPLC chromatograms of **8** in saline before injection, in urine at 30 min and 120 min p.i., and in feces at 120 min p.i. Each mouse was administered with ~ 100  $\mu$ Ci of **8**. Variation of HPLC retention times was caused by the presence of acetonitrile in both urine and feces samples.

Figure SIII. Radio-HPLC chromatograms of **10** in saline before injection, in urine at 30 min and 120 min p.i., and in feces at 120 min p.i. Each mouse was administered with ~ 100  $\mu$ Ci of **10**.

Table SI. Biodistribution data and T/B ratios of **7** in the athymic nude mice bearing MDA-MB-435 human breast cancer xenografts. The organ uptake is expressed as %ID/g. Each data point represents an average of biodistribution data from four animals.

| %ID/gram      | 30 min       | 60 min       | Blocking (60min) | 120 min      |
|---------------|--------------|--------------|------------------|--------------|
| Blood         | 1.13 ± 0.21  | 0.73 ± 0.14  | 0.21 ± 0.03      | 0.30 ± 0.06  |
| Brain         | 0.25 ± 0.03  | 0.18 ± 0.03  | 0.06 ± 0.06      | 0.19 ± 0.05  |
| Eyes          | 2.05 ± 0.49  | 2.11 ± 0.21  | 0.13 ± 0.02      | 1.69 ± 0.25  |
| Heart         | 3.57 ± 1.06  | 2.71 ± 0.32  | 0.15 ± 0.06      | 2.05 ± 0.42  |
| Intestine     | 13.00 ± 2.35 | 9.55 ± 2.12  | 0.47 ± 0.11      | 9.38 ± 3.43  |
| Kidney        | 20.90 ± 3.49 | 15.45 ± 0.73 | 5.26 ± 0.77      | 10.74 ± 2.23 |
| Liver         | 4.20 ± 0.42  | 3.24 ± 0.47  | 0.19 ± 0.02      | 2.68 ± 0.46  |
| Lungs         | 6.70 ± 0.80  | 4.97 ± 0.31  | 0.40 ± 0.12      | 4.43 ± 0.22  |
| Muscle        | 3.13 ± 1.04  | 2.30 ± 0.18  | 0.25 ± 0.09      | 1.60 ± 0.32  |
| Spleen        | 3.85 ± 0.67  | 3.32 ± 0.82  | 0.28 ± 0.05      | 2.37 ± 0.35  |
| MDA435        | 8.48 ± 0.59  | 7.86 ± 2.23  | 0.55 ± 0.04      | 9.11 ± 1.83  |
| MDA435/Blood  | 7.67 ± 1.49  | 10.81 ± 2.45 | 2.68 ± 0.29      | 30.85 ± 7.95 |
| MDA435/Liver  | 2.03 ± 0.25  | 2.46 ± 0.80  | 2.84 ± 0.48      | 3.39 ± 0.34  |
| MDA435/Lungs  | 1.29 ± 0.24  | 1.60 ± 0.54  | 1.43 ± 0.40      | 2.05 ± 0.39  |
| MDA435/Muscle | 2.84 ± 0.93  | 3.42 ± 0.96  | 2.29 ± 0.64      | 5.57 ± 0.69  |

Table SII. Biodistribution data and T/B ratios of **8** in the athymic nude mice bearing MDA-MB-435 human breast cancer xenografts. The organ uptake is expressed as %ID/g. Each data point represents an average of biodistribution data from four animals.

| %ID/gram            | 30 min       | 60 min       | 120 min      |
|---------------------|--------------|--------------|--------------|
| Blood               | 1.09 ± 0.20  | 0.51 ± 0.05  | 0.38 ± 0.10  |
| Brain               | 0.22 ± 0.04  | 0.19 ± 0.06  | 0.14 ± 0.03  |
| Eyes                | 2.05 ± 0.30  | 1.86 ± 0.67  | 1.44 ± 0.23  |
| Heart               | 2.83 ± 0.58  | 1.81 ± 0.38  | 1.43 ± 0.37  |
| Intestine           | 10.52 ± 1.41 | 6.57 ± 1.41  | 7.11 ± 2.11  |
| Kidney              | 17.47 ± 2.00 | 10.78 ± 2.04 | 8.01 ± 0.68  |
| Liver               | 3.28 ± 0.44  | 2.62 ± 0.42  | 2.47 ± 0.25  |
| Lungs               | 5.95 ± 0.59  | 3.84 ± 0.70  | 3.16 ± 0.68  |
| Muscle              | 2.33 ± 0.61  | 1.40 ± 0.17  | 1.05 ± 0.42  |
| Spleen              | 3.06 ± 0.84  | 2.21 ± 0.32  | 2.06 ± 0.59  |
| MDA-MB-435          | 8.34 ± 0.39  | 7.85 ± 0.94  | 7.60 ± 0.68  |
| Tumor/Blood Ratio   | 8.30 ± 1.13  | 15.33 ± 1.60 | 20.66 ± 5.04 |
| Tumor /Liver Ratio  | 3.05 ± 1.15  | 3.14 ± 0.42  | 3.08 ± 0.23  |
| Tumor Lung Ratio    | 1.57 ± 0.23  | 2.19 ± 0.37  | 2.53 ± 0.52  |
| Tumor /Muscle Ratio | 4.32 ± 1.41  | 5.73 ± 1.07  | 7.49 ± 2.39  |

Table SIII. Biodistribution data and T/B ratios of **7** in the athymic nude mice bearing U87MG human glioma xenografts. The organ uptake is expressed as %ID/g. Each data point represents an average of biodistribution data from four animals.

| %ID/gram            | 30 min       | 60 min       | 120 min      |
|---------------------|--------------|--------------|--------------|
| Blood               | 1.49 ± 0.31  | 0.56 ± 0.08  | 0.27 ± 0.04  |
| Brain               | 0.28 ± 0.04  | 0.23 ± 0.07  | 0.17 ± 0.03  |
| Eyes                | 2.59 ± 0.52  | 2.18 ± 0.49  | 1.76 ± 0.31  |
| Heart               | 3.90 ± 0.49  | 2.63 ± 0.29  | 1.96 ± 0.65  |
| Intestine           | 15.57 ± 5.22 | 12.90 ± 4.87 | 9.02 ± 2.95  |
| Kidney              | 23.33 ± 2.78 | 15.92 ± 1.18 | 9.99 ± 0.61  |
| Liver               | 4.82 ± 0.49  | 3.24 ± 0.15  | 3.35 ± 0.54  |
| Lungs               | 8.02 ± 0.44  | 6.14 ± 0.96  | 4.05 ± 0.58  |
| Muscle              | 2.72 ± 0.33  | 1.91 ± 0.26  | 1.25 ± 0.10  |
| Spleen              | 5.06 ± 0.39  | 3.44 ± 0.51  | 3.83 ± 0.64  |
| U87MG               | 13.43 ± 0.98 | 11.02 ± 2.34 | 7.74 ± 1.25  |
| Tumor/Blood Ratio   | 9.19 ± 1.79  | 19.75 ± 2.19 | 29.02 ± 4.68 |
| Tumor /Liver Ratio  | 2.85 ± 0.29  | 3.39 ± 0.61  | 2.39 ± 0.50  |
| Tumor Lung Ratio    | 1.70 ± 0.18  | 1.77 ± 0.27  | 2.00 ± 0.43  |
| Tumor /Muscle Ratio | 4.86 ± 0.31  | 5.68 ± 0.50  | 6.32 ± 1.21  |

Table SIV. Biodistribution data and T/B ratios of **10** in the athymic nude mice bearing U87MG human glioma xenografts. The organ uptake is expressed as %ID/g. Each data point represents an average of biodistribution data from four animals.

| %ID/gram            | 30 min       | 60 min      | 120 min      |
|---------------------|--------------|-------------|--------------|
| Blood               | 1.53 ± 0.40  | 0.91 ± 0.29 | 0.25 ± 0.09  |
| Brain               | 0.17 ± 0.02  | 0.11 ± 0.02 | 0.10 ± 0.01  |
| Eyes                | 1.49 ± 0.51  | 0.88 ± 0.15 | 0.53 ± 0.11  |
| Heart               | 1.66 ± 0.38  | 1.12 ± 0.33 | 0.60 ± 0.12  |
| Intestine           | 10.03 ± 6.10 | 4.93 ± 2.00 | 3.49 ± 0.89  |
| Kidney              | 10.88 ± 2.02 | 7.24 ± 2.72 | 3.75 ± 0.48  |
| Liver               | 3.40 ± 0.54  | 2.67 ± 0.66 | 2.22 ± 0.32  |
| Lungs               | 5.04 ± 0.79  | 3.23 ± 0.68 | 1.76 ± 0.56  |
| Muscle              | 1.89 ± 0.42  | 1.36 ± 0.45 | 0.64 ± 0.13  |
| Spleen              | 3.77 ± 0.80  | 2.85 ± 0.72 | 2.22 ± 0.73  |
| U87MG               | 6.70 ± 1.59  | 5.62 ± 1.12 | 3.03 ± 0.54  |
| Tumor/Blood Ratio   | 4.42 ± 0.48  | 6.03 ± 1.51 | 13.08 ± 3.84 |
| Tumor /Liver Ratio  | 1.95 ± 0.26  | 1.98 ± 0.42 | 1.40 ± 0.16  |
| Tumor Lung Ratio    | 1.32 ± 0.15  | 1.69 ± 0.32 | 1.90 ± 0.43  |
| Tumor /Muscle Ratio | 3.49 ± 1.01  | 4.00 ± 1.01 | 4.98 ± 1.37  |

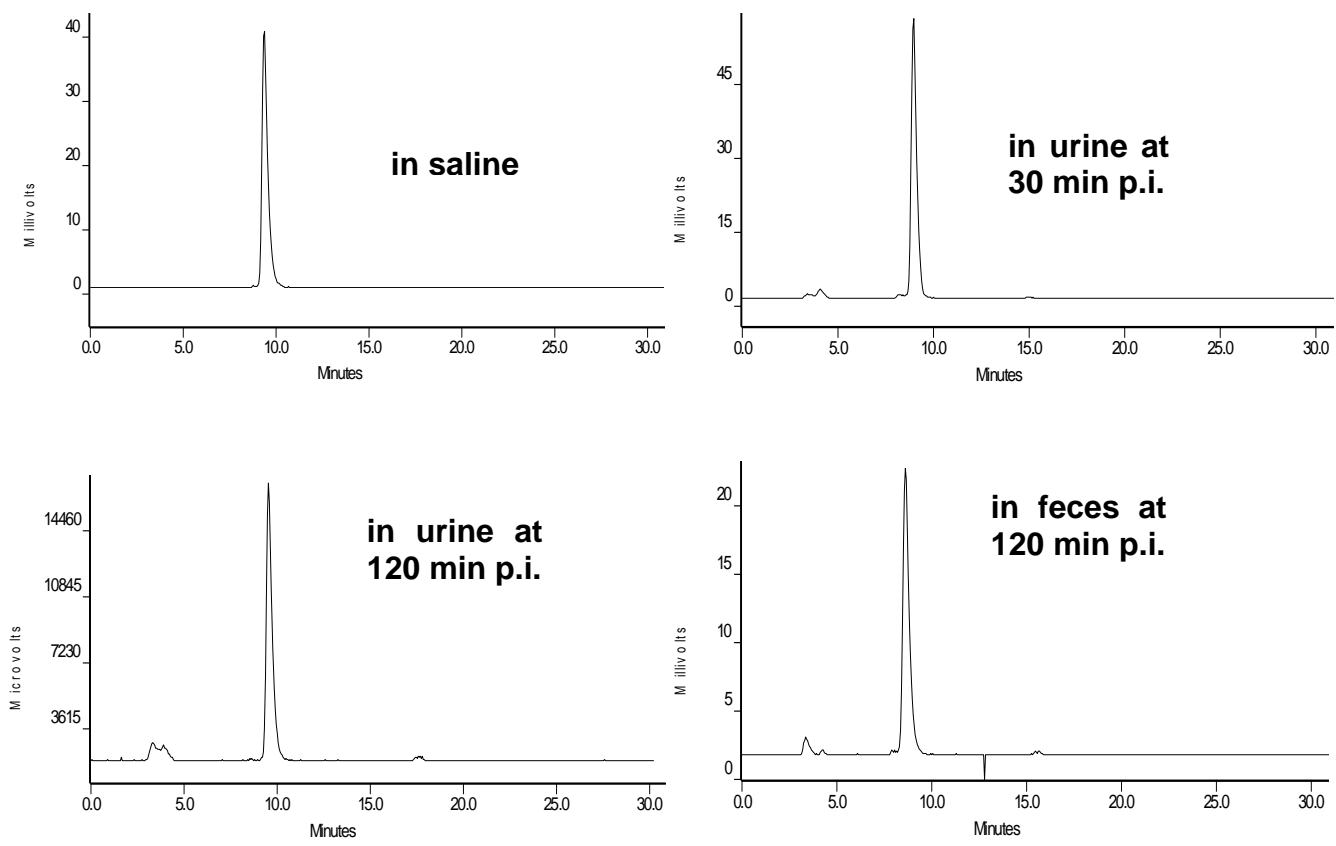

Fig. SI

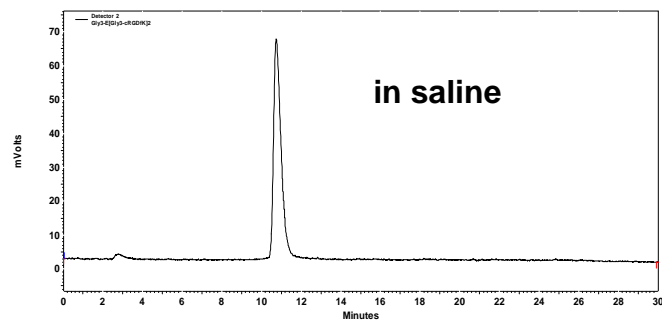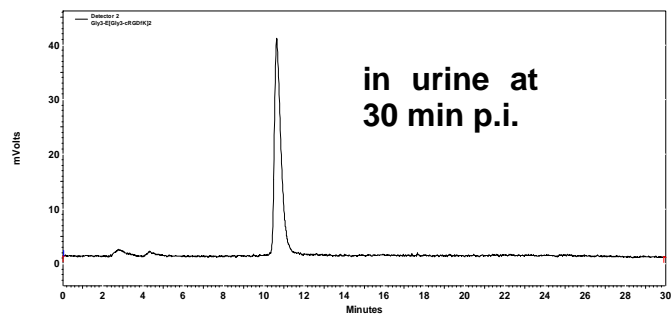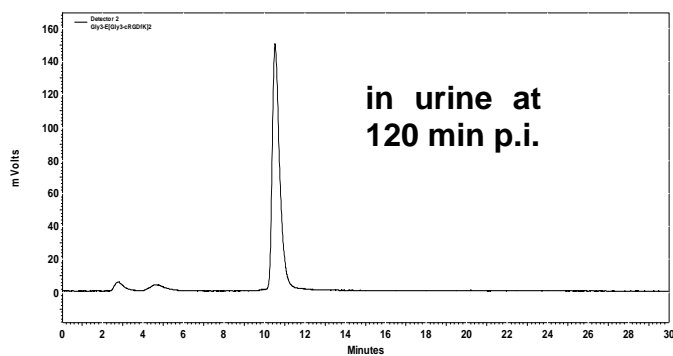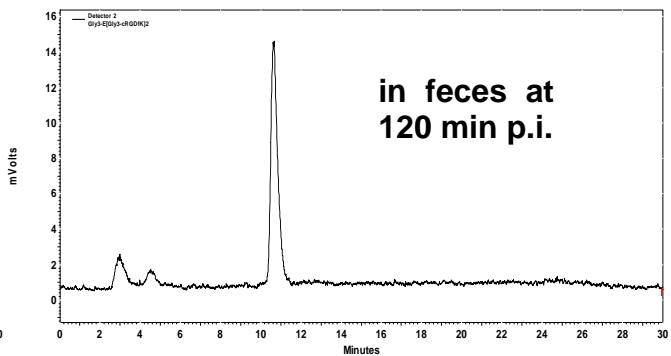

Fig. SII



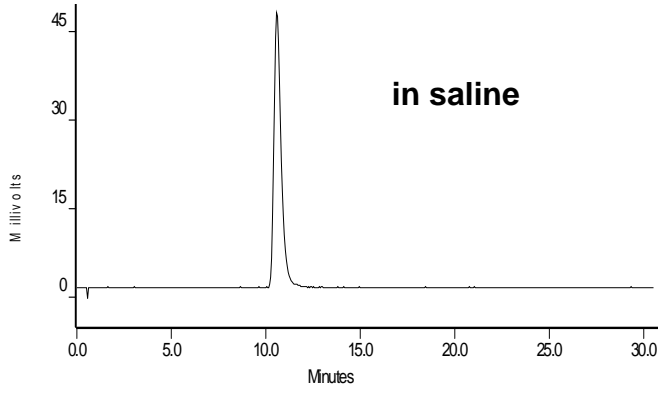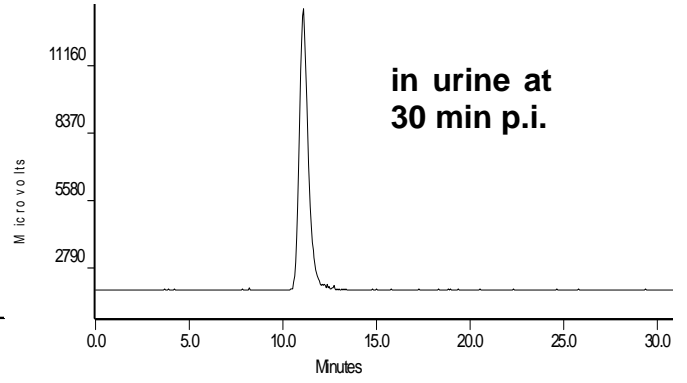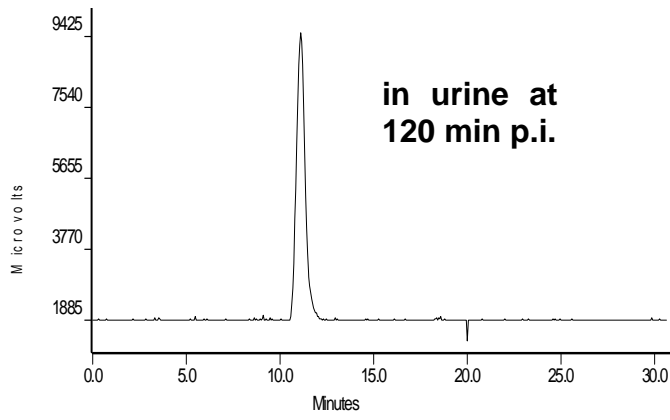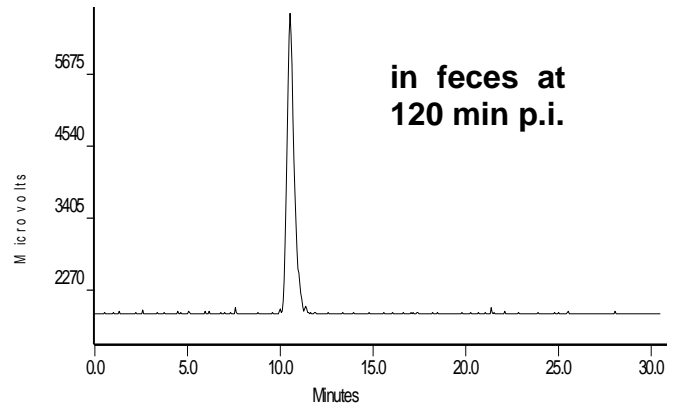

Fig. SIII
